# Supplementary material for: A ToF-SIMS study of the deuterium—hydrogen exchange induced by ammonia plasma treatment of polyolefins
Source: Royal Society of Chemistry journal article supplement (doi:10.1039/c1ja10043b), 2011-01-01
Supplement: c1ja10043b.pdf [file c1ja10043b.pdf]

## Supporting Information

### A ToF-SIMS study of the deuterium - hydrogen exchange induced by ammonia plasma treatment of polyolefins

Hyegeun Min,<sup>a</sup> Sascha Wettmarshausen,<sup>b</sup> Jörg F. Friedrich,<sup>b</sup> and Wolfgang E. S. Unger<sup>\*,a</sup>

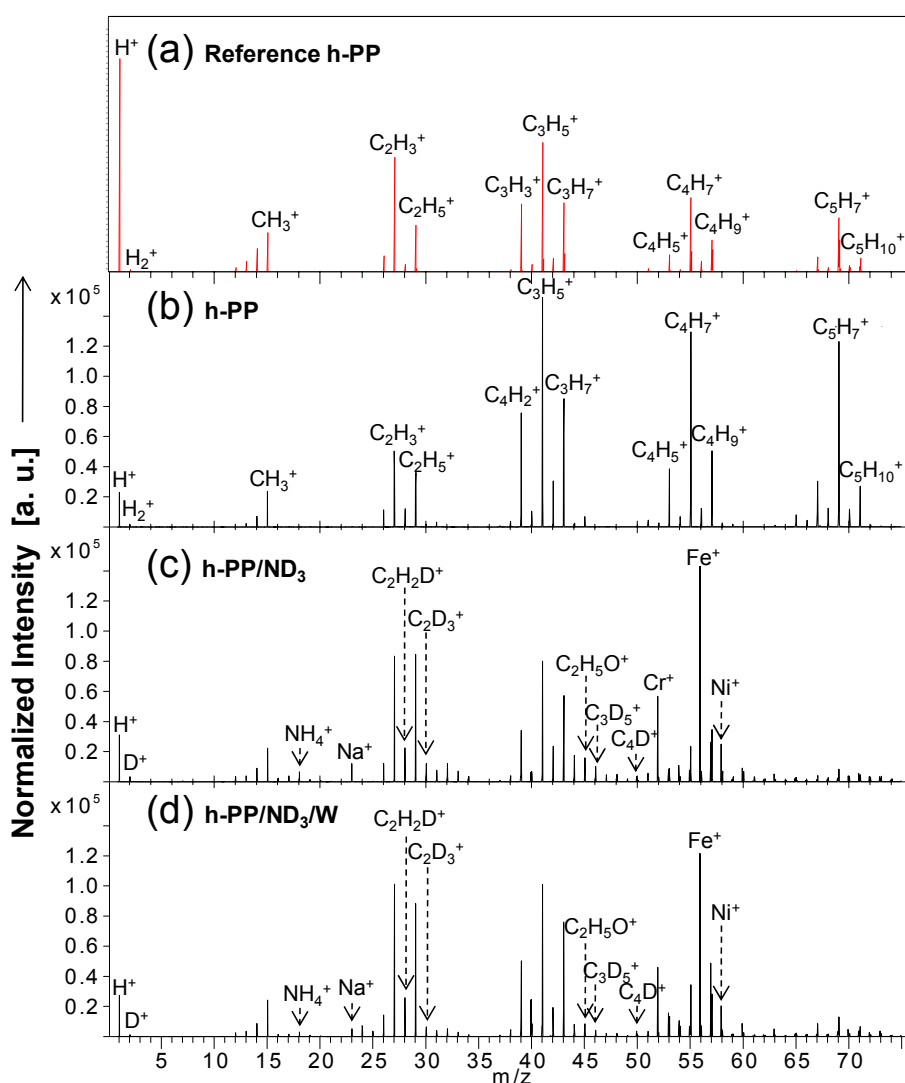

**Figure S1** Positive ToF-SIMS spectra for h-PP (b) before and after (c)  $ND_3$  plasma treatment, and (d) post-plasma washing. The reference h-PP spectrum (a) was taken from *The Static SIMS Library*.<sup>34</sup>

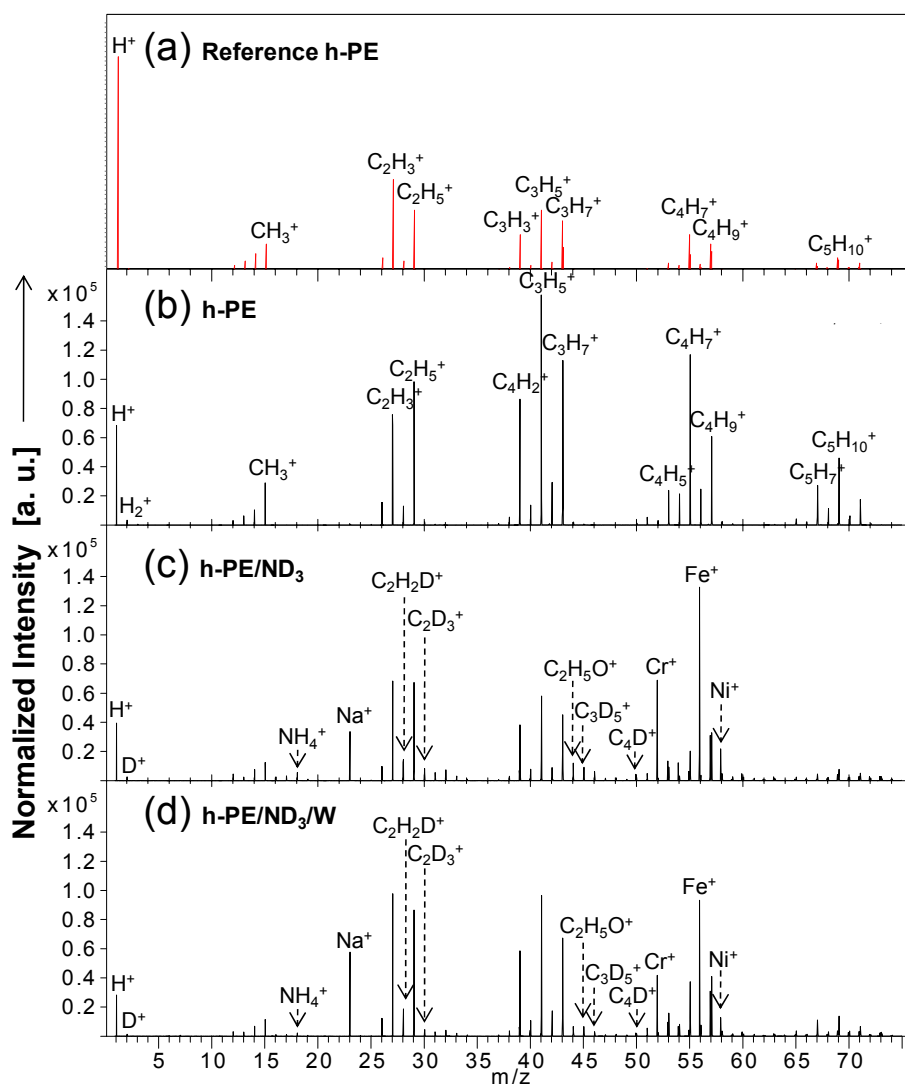

**Figure S2** Positive ToF-SIMS spectra for h-PE (b) before and after (c) ND<sub>3</sub> plasma treatment, and (d) post-plasma washing. The reference h-PE spectrum (a) was taken from *The Static SIMS Library*.<sup>34</sup>

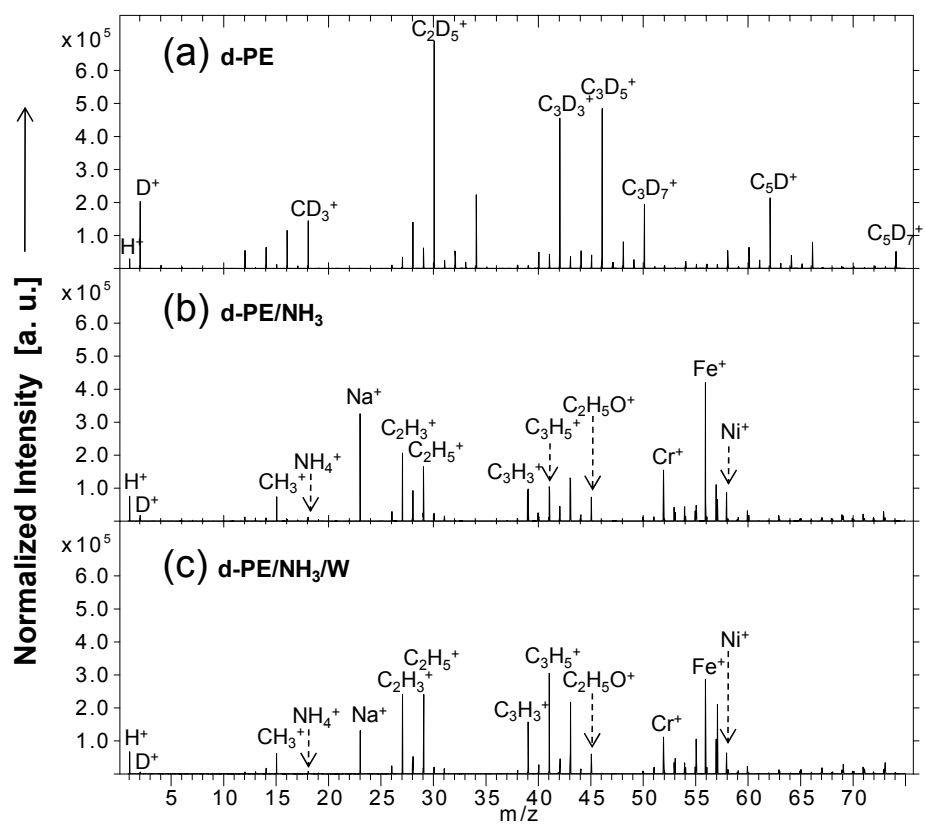

**Figure S3** Positive ToF-SIMS spectra for d-PE (a) before and after (b)  $NH_3$  plasma treatment, and (c) post-plasma washing.

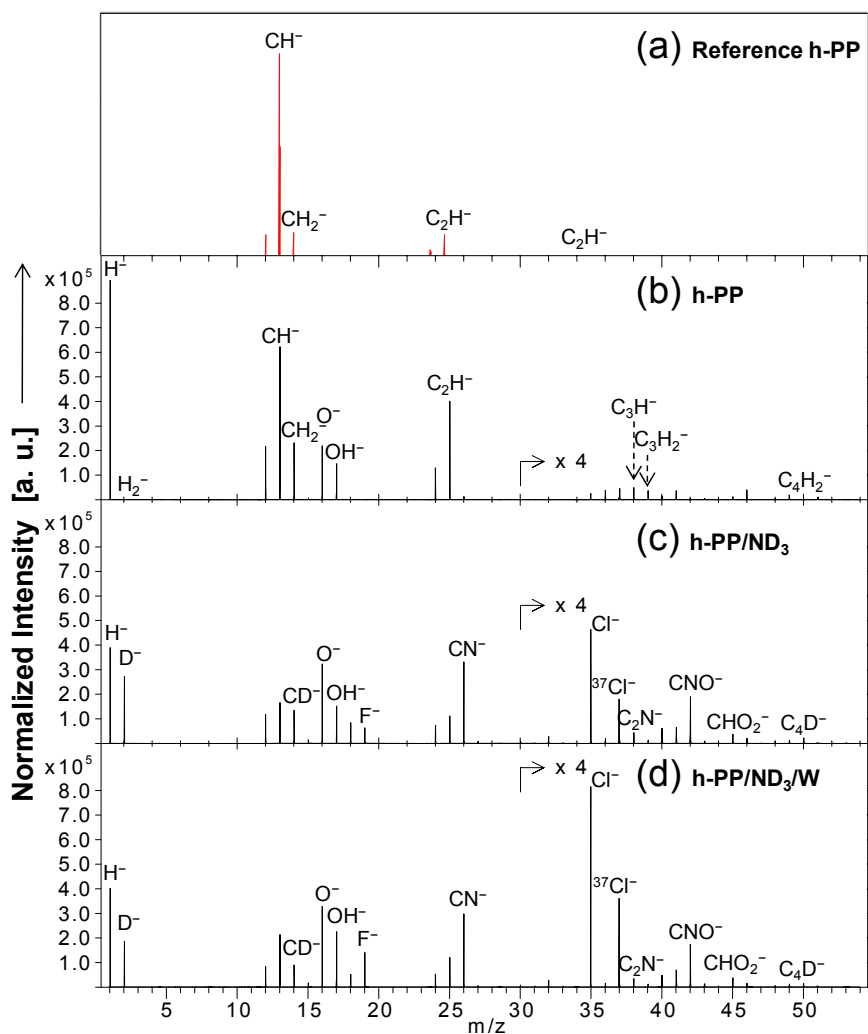

**Figure S4** Negative ToF-SIMS spectra for h-PP (b) before and after (c) ND<sub>3</sub> plasma treatment, and (d) post-plasma washing. The reference h-PP spectrum (a) was taken from *The Static SIMS Library*.<sup>34</sup>

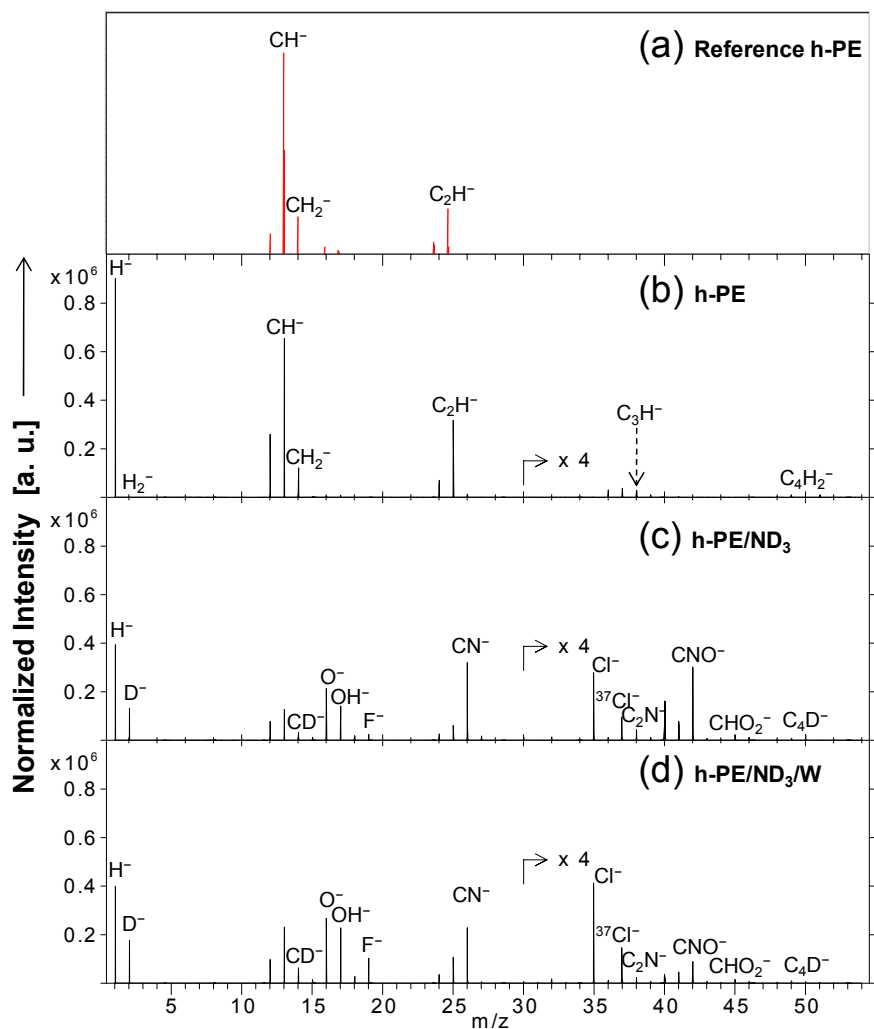

**Figure S5** Negative ToF-SIMS spectra for h-PE (b) before and after (c)  $\text{ND}_3$  plasma treatment, and (d) post-plasma washing. The reference h-PE spectrum (a) was taken from *The Static SIMS Library*.<sup>34</sup>

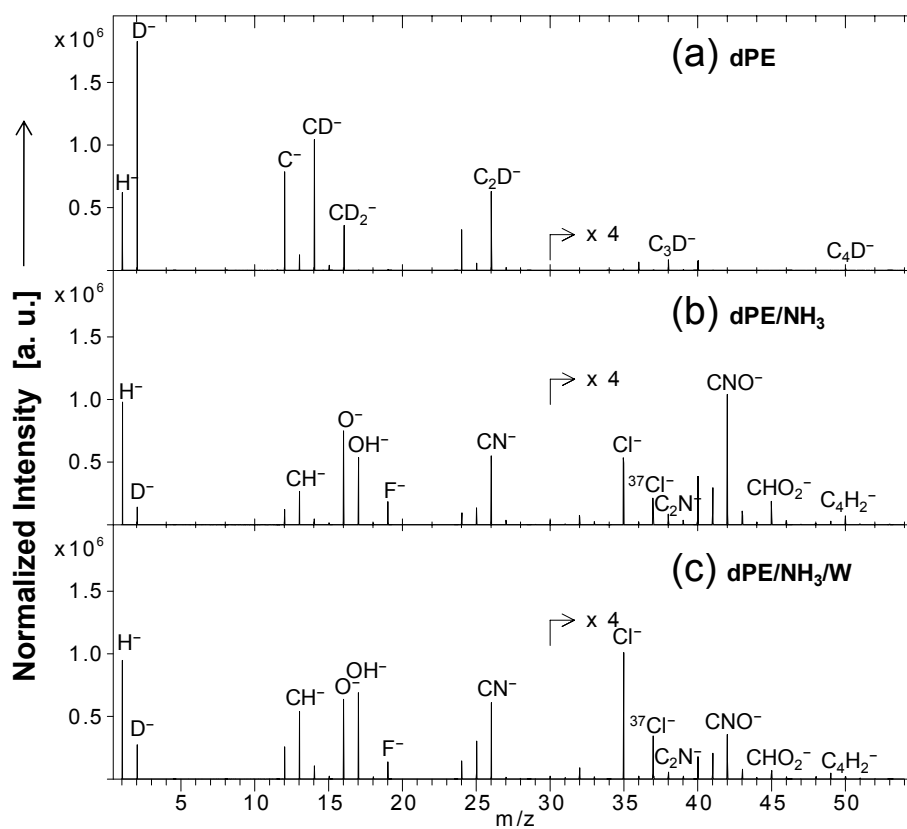

**Figure S6** Negative ToF-SIMS spectra for d-PE (a) before and after (b)  $NH_3$  plasma treatment, and (c) post-plasma washing.

**Table S1** D-H and H-D exchange related fragments for ND<sub>3</sub> plasma-treated h-PP and h-PE, and NH<sub>3</sub> plasma-treated d-PE samples, respectively, in their positive ToF-SIMS spectra.

| Mass<br><i>m/z</i> | PP                                                                                                                                                                   | Species<br>PE                                                                                                                                          | dPE                                                                                                                                                                                                               |
|--------------------|----------------------------------------------------------------------------------------------------------------------------------------------------------------------|--------------------------------------------------------------------------------------------------------------------------------------------------------|-------------------------------------------------------------------------------------------------------------------------------------------------------------------------------------------------------------------|
| 1                  |                                                                                                                                                                      |                                                                                                                                                        | H <sup>+</sup>                                                                                                                                                                                                    |
| 2                  | D <sup>+</sup>                                                                                                                                                       | D <sup>+</sup>                                                                                                                                         | H <sub>2</sub> <sup>+</sup>                                                                                                                                                                                       |
| 3                  | HD <sup>+</sup>                                                                                                                                                      | HD <sup>+</sup>                                                                                                                                        |                                                                                                                                                                                                                   |
| 13                 |                                                                                                                                                                      |                                                                                                                                                        | CH <sup>+</sup>                                                                                                                                                                                                   |
| 14                 |                                                                                                                                                                      |                                                                                                                                                        | CH <sub>2</sub> <sup>+</sup>                                                                                                                                                                                      |
| 15                 |                                                                                                                                                                      |                                                                                                                                                        | CH <sub>3</sub> <sup>+</sup>                                                                                                                                                                                      |
| 18                 | CD <sub>3</sub> <sup>+</sup>                                                                                                                                         | CD <sub>3</sub> <sup>+</sup>                                                                                                                           |                                                                                                                                                                                                                   |
| 27                 |                                                                                                                                                                      |                                                                                                                                                        | C <sub>2</sub> H <sub>3</sub> <sup>+</sup>                                                                                                                                                                        |
| 28                 | C <sub>2</sub> H <sub>2</sub> D <sup>+</sup> (C <sub>2</sub> D <sub>2</sub> <sup>+</sup> )                                                                           | C <sub>2</sub> H <sub>2</sub> D <sup>+</sup> (C <sub>2</sub> D <sub>2</sub> <sup>+</sup> )                                                             | C <sub>2</sub> DH <sub>2</sub> <sup>+</sup> (C <sub>2</sub> H <sub>4</sub> <sup>+</sup> )                                                                                                                         |
| 29                 | C <sub>2</sub> H <sub>3</sub> D <sup>+</sup>                                                                                                                         |                                                                                                                                                        | C <sub>2</sub> H <sub>5</sub> <sup>+</sup> (C <sub>2</sub> DH <sub>3</sub> <sup>+</sup> )                                                                                                                         |
| 30                 | C <sub>2</sub> D <sub>3</sub> <sup>+</sup> (C <sub>2</sub> H <sub>2</sub> D <sub>2</sub> <sup>+</sup> , C <sub>2</sub> H <sub>4</sub> D <sup>+</sup> )               | C <sub>2</sub> D <sub>3</sub> <sup>+</sup> (C <sub>2</sub> H <sub>2</sub> D <sub>2</sub> <sup>+</sup> , C <sub>2</sub> H <sub>4</sub> D <sup>+</sup> ) |                                                                                                                                                                                                                   |
| 31                 | C <sub>2</sub> H <sub>3</sub> D <sub>2</sub> <sup>+</sup> (C <sub>2</sub> HD <sub>3</sub> <sup>+</sup> )                                                             | C <sub>2</sub> H <sub>3</sub> D <sub>2</sub> <sup>+</sup> (C <sub>2</sub> HD <sub>3</sub> <sup>+</sup> )                                               |                                                                                                                                                                                                                   |
| 32                 | C <sub>2</sub> H <sub>2</sub> D <sub>3</sub> <sup>+</sup> (C <sub>2</sub> D <sub>4</sub> <sup>+</sup> )                                                              |                                                                                                                                                        |                                                                                                                                                                                                                   |
| 33                 | C <sub>2</sub> HD <sub>4</sub> <sup>+</sup>                                                                                                                          | C <sub>2</sub> HD <sub>4</sub> <sup>+</sup>                                                                                                            |                                                                                                                                                                                                                   |
| 34                 | C <sub>2</sub> D <sub>5</sub> <sup>+</sup>                                                                                                                           | C <sub>2</sub> D <sub>5</sub> <sup>+</sup>                                                                                                             |                                                                                                                                                                                                                   |
| 39                 |                                                                                                                                                                      |                                                                                                                                                        | C <sub>3</sub> H <sub>3</sub> <sup>+</sup>                                                                                                                                                                        |
| 41                 |                                                                                                                                                                      |                                                                                                                                                        | C <sub>3</sub> H <sub>5</sub> <sup>+</sup> (C <sub>3</sub> DH <sub>3</sub> <sup>+</sup> )                                                                                                                         |
| 43                 |                                                                                                                                                                      |                                                                                                                                                        | C <sub>3</sub> H <sub>7</sub> <sup>+</sup> (C <sub>3</sub> DH <sub>5</sub> <sup>+</sup> , C <sub>3</sub> D <sub>2</sub> H <sub>3</sub> <sup>+</sup> )                                                             |
| 45                 | C <sub>3</sub> HD <sub>4</sub> <sup>+</sup> (C <sub>3</sub> H <sub>3</sub> D <sub>3</sub> <sup>+</sup> , C <sub>3</sub> H <sub>5</sub> D <sub>2</sub> <sup>+</sup> ) |                                                                                                                                                        |                                                                                                                                                                                                                   |
| 46                 | C <sub>3</sub> D <sub>5</sub> <sup>+</sup> (C <sub>3</sub> H <sub>2</sub> D <sub>4</sub> <sup>+</sup> , C <sub>3</sub> H <sub>4</sub> D <sub>3</sub> <sup>+</sup> )  |                                                                                                                                                        |                                                                                                                                                                                                                   |
| 49                 | C <sub>3</sub> HD <sub>6</sub> <sup>+</sup>                                                                                                                          |                                                                                                                                                        |                                                                                                                                                                                                                   |
| 50                 |                                                                                                                                                                      |                                                                                                                                                        | C <sub>4</sub> H <sub>2</sub> <sup>+</sup>                                                                                                                                                                        |
| 51                 |                                                                                                                                                                      |                                                                                                                                                        | C <sub>4</sub> H <sub>3</sub> <sup>+</sup> (C <sub>4</sub> HD <sup>+</sup> )                                                                                                                                      |
| 52                 |                                                                                                                                                                      |                                                                                                                                                        | C <sub>4</sub> DH <sub>2</sub> <sup>+</sup> (C <sub>4</sub> H <sub>4</sub> <sup>+</sup> )                                                                                                                         |
| 53                 |                                                                                                                                                                      |                                                                                                                                                        | C <sub>4</sub> H <sub>5</sub> <sup>+</sup> (C <sub>4</sub> DH <sub>3</sub> <sup>+</sup> , C <sub>3</sub> D <sub>2</sub> H <sup>+</sup> )                                                                          |
| 54                 |                                                                                                                                                                      |                                                                                                                                                        | C <sub>4</sub> DH <sub>4</sub> <sup>+</sup> (C <sub>4</sub> H <sub>6</sub> <sup>+</sup> , C <sub>4</sub> D <sub>2</sub> H <sub>2</sub> <sup>+</sup> )                                                             |
| 55                 |                                                                                                                                                                      |                                                                                                                                                        | C <sub>4</sub> H <sub>7</sub> <sup>+</sup> (C <sub>4</sub> DH <sub>5</sub> <sup>+</sup> , C <sub>4</sub> D <sub>2</sub> H <sub>3</sub> <sup>+</sup> )                                                             |
| 56                 |                                                                                                                                                                      |                                                                                                                                                        | C <sub>4</sub> D <sub>2</sub> H <sub>4</sub> <sup>+</sup> (C <sub>4</sub> D <sub>3</sub> H <sub>2</sub> <sup>+</sup> , C <sub>4</sub> DH <sub>6</sub> <sup>+</sup> , C <sub>4</sub> H <sub>8</sub> <sup>+</sup> ) |
| 57                 |                                                                                                                                                                      |                                                                                                                                                        | C <sub>4</sub> H <sub>9</sub> <sup>+</sup> (C <sub>4</sub> DH <sub>7</sub> <sup>+</sup> , C <sub>4</sub> D <sub>2</sub> H <sub>5</sub> <sup>+</sup> )                                                             |
| 61                 |                                                                                                                                                                      |                                                                                                                                                        | C <sub>5</sub> H <sup>+</sup>                                                                                                                                                                                     |
| 62                 |                                                                                                                                                                      |                                                                                                                                                        | C <sub>5</sub> H <sub>2</sub> <sup>+</sup>                                                                                                                                                                        |
| 63                 | C <sub>5</sub> HD <sup>+</sup>                                                                                                                                       | C <sub>5</sub> HD <sup>+</sup>                                                                                                                         | C <sub>5</sub> H <sub>3</sub> <sup>+</sup>                                                                                                                                                                        |
| 64                 | C <sub>5</sub> DH <sub>2</sub> <sup>+</sup> (C <sub>5</sub> D <sub>2</sub> <sup>+</sup> )                                                                            |                                                                                                                                                        | C <sub>5</sub> DH <sub>2</sub> <sup>+</sup> (C <sub>5</sub> H <sub>4</sub> <sup>+</sup> )                                                                                                                         |
| 65                 |                                                                                                                                                                      |                                                                                                                                                        | C <sub>5</sub> H <sub>5</sub> <sup>+</sup> (C <sub>4</sub> DH <sub>3</sub> <sup>+</sup> , C <sub>4</sub> D <sub>2</sub> H <sup>+</sup> )                                                                          |
| 66                 |                                                                                                                                                                      |                                                                                                                                                        | C <sub>5</sub> D <sub>2</sub> H <sub>2</sub> <sup>+</sup> (C <sub>5</sub> DH <sub>4</sub> <sup>+</sup> , C <sub>5</sub> H <sub>6</sub> <sup>+</sup> )                                                             |
| 67                 |                                                                                                                                                                      |                                                                                                                                                        | C <sub>5</sub> H <sub>7</sub> <sup>+</sup> (C <sub>5</sub> DH <sub>5</sub> <sup>+</sup> , C <sub>5</sub> D <sub>2</sub> H <sub>3</sub> <sup>+</sup> )                                                             |
| 69                 |                                                                                                                                                                      |                                                                                                                                                        | C <sub>5</sub> H <sub>9</sub> <sup>+</sup>                                                                                                                                                                        |

**Table S2** D-H and H-D exchange related fragments for ND<sub>3</sub> plasma-treated h-PP and h-PE, and NH<sub>3</sub> plasma-treated d-PE samples, respectively, in their negative ToF-SIMS spectra.

| Mass<br><i>m/z</i> | Species                       |                               |                               |
|--------------------|-------------------------------|-------------------------------|-------------------------------|
|                    | PP                            | PE                            | dPE                           |
| 1                  |                               |                               | H <sup>-</sup>                |
| 2                  | D <sup>-</sup>                | D <sup>-</sup>                |                               |
| 13                 |                               |                               | CH <sup>-</sup>               |
| 25                 |                               |                               | C <sub>2</sub> H <sup>-</sup> |
| 37                 |                               |                               | C <sub>3</sub> H <sup>-</sup> |
| 49                 |                               |                               | C <sub>4</sub> H <sup>-</sup> |
| 50                 | C <sub>4</sub> D <sup>-</sup> | C <sub>4</sub> D <sup>-</sup> |                               |

**Table S3** N-containing secondary ion species for ND<sub>3</sub> plasma-treated h-PP and h-PE, and NH<sub>3</sub> plasma-treated d-PE samples in their negative ToF-SIMS spectra.

| Mass<br><i>m/z</i> | Species                                          |                                                  |                                                  |
|--------------------|--------------------------------------------------|--------------------------------------------------|--------------------------------------------------|
|                    | PP                                               | PE                                               | dPE                                              |
| 15                 | NH <sup>-</sup>                                  | NH <sup>-</sup>                                  | NH <sup>-</sup>                                  |
| 16                 | NH <sub>2</sub> <sup>-</sup>                     | NH <sub>2</sub> <sup>-</sup>                     | NH <sub>2</sub> <sup>-</sup>                     |
| 17                 | NH <sub>3</sub> <sup>-</sup> (NHD <sup>-</sup> ) | NH <sub>3</sub> <sup>-</sup> (NHD <sup>-</sup> ) | NH <sub>3</sub> <sup>-</sup> (NHD <sup>-</sup> ) |
| 26                 | CN <sup>-</sup>                                  | CN <sup>-</sup>                                  | CN <sup>-</sup>                                  |
| 38                 | C <sub>2</sub> N <sup>-</sup>                    | C <sub>2</sub> N <sup>-</sup>                    | C <sub>2</sub> N <sup>-</sup>                    |
| 39                 |                                                  |                                                  | C <sub>2</sub> HN <sup>-</sup>                   |
| 40                 |                                                  | CN <sub>2</sub> <sup>-</sup>                     | CN <sub>2</sub> <sup>-</sup>                     |
| 41                 |                                                  | CHN <sub>2</sub> <sup>-</sup>                    | CHN <sub>2</sub> <sup>-</sup>                    |



**Table S4** O-containing secondary ion species for ND<sub>3</sub> plasma-treated h-PP and h-PE, and NH<sub>3</sub> plasma-treated d-PE samples in their positive ToF-SIMS spectra.

| Mass<br><i>m/z</i> | PP                                                                                                                                                                                                         | Species<br>PE                                                                                                                                                                                              | dPE                                                                                                                                                                                                                                                                      |
|--------------------|------------------------------------------------------------------------------------------------------------------------------------------------------------------------------------------------------------|------------------------------------------------------------------------------------------------------------------------------------------------------------------------------------------------------------|--------------------------------------------------------------------------------------------------------------------------------------------------------------------------------------------------------------------------------------------------------------------------|
| 16                 |                                                                                                                                                                                                            | O <sup>+</sup>                                                                                                                                                                                             | O <sup>+</sup>                                                                                                                                                                                                                                                           |
| 18                 |                                                                                                                                                                                                            |                                                                                                                                                                                                            | H <sub>2</sub> O <sup>+</sup> (OD <sup>+</sup> )                                                                                                                                                                                                                         |
| 19                 | H <sub>3</sub> O <sup>+</sup>                                                                                                                                                                              | H <sub>3</sub> O <sup>+</sup>                                                                                                                                                                              | H <sub>3</sub> O <sup>+</sup>                                                                                                                                                                                                                                            |
| 29                 | CHO <sup>+</sup>                                                                                                                                                                                           | CHO <sup>+</sup>                                                                                                                                                                                           | CHO <sup>+</sup>                                                                                                                                                                                                                                                         |
| 30                 | CDO <sup>+</sup> (CH <sub>2</sub> O <sup>+</sup> )                                                                                                                                                         | CDO <sup>+</sup> (CH <sub>2</sub> O <sup>+</sup> )                                                                                                                                                         | CDO <sup>+</sup> (CH <sub>2</sub> O <sup>+</sup> )                                                                                                                                                                                                                       |
| 31                 | CH <sub>3</sub> O <sup>+</sup> (CDHO <sup>+</sup> )                                                                                                                                                        | CH <sub>3</sub> O <sup>+</sup> (CDHO <sup>+</sup> )                                                                                                                                                        | CH <sub>3</sub> O <sup>+</sup> (CDHO <sup>+</sup> )                                                                                                                                                                                                                      |
| 32                 | CH <sub>2</sub> DO <sup>+</sup> (CD <sub>2</sub> O <sup>+</sup> , CH <sub>4</sub> O <sup>+</sup> )                                                                                                         | CH <sub>2</sub> DO <sup>+</sup> (CD <sub>2</sub> O <sup>+</sup> , CH <sub>4</sub> O <sup>+</sup> )                                                                                                         | CD <sub>2</sub> O <sup>+</sup> (CDH <sub>2</sub> O <sup>+</sup> , CH <sub>4</sub> O <sup>+</sup> )                                                                                                                                                                       |
| 33                 | CHD <sub>2</sub> O <sup>+</sup> (CH <sub>3</sub> DO <sup>+</sup> , CH <sub>5</sub> O <sup>+</sup> )                                                                                                        | CHD <sub>2</sub> O <sup>+</sup> (CH <sub>3</sub> DO <sup>+</sup> , CH <sub>5</sub> O <sup>+</sup> )                                                                                                        | CD <sub>2</sub> HO <sup>+</sup> (CH <sub>3</sub> DO <sup>+</sup> , CH <sub>5</sub> O <sup>+</sup> )                                                                                                                                                                      |
| 42                 | C <sub>2</sub> DO <sup>+</sup> (C <sub>2</sub> H <sub>2</sub> O <sup>+</sup> )                                                                                                                             | C <sub>2</sub> DO <sup>+</sup> (C <sub>2</sub> H <sub>2</sub> O <sup>+</sup> )                                                                                                                             | C <sub>2</sub> H <sub>2</sub> O <sup>+</sup> (C <sub>2</sub> H <sub>2</sub> O <sup>+</sup> )                                                                                                                                                                             |
| 43                 | C <sub>2</sub> H <sub>3</sub> O <sup>+</sup> (C <sub>2</sub> DHO <sup>+</sup> )                                                                                                                            | C <sub>2</sub> HDO <sup>+</sup> (C <sub>2</sub> H <sub>3</sub> O <sup>+</sup> )                                                                                                                            | C <sub>2</sub> H <sub>3</sub> O <sup>+</sup> (C <sub>2</sub> DHO <sup>+</sup> )                                                                                                                                                                                          |
| 44                 | CH <sub>2</sub> NO <sup>+</sup> (CDNO <sup>+</sup> )                                                                                                                                                       | CH <sub>2</sub> NO <sup>+</sup> (CDNO <sup>+</sup> )                                                                                                                                                       | CDNO <sup>+</sup> (C <sub>2</sub> H <sub>2</sub> NO <sup>+</sup> )                                                                                                                                                                                                       |
| 44                 | C <sub>2</sub> H <sub>2</sub> DO <sup>+</sup> (C <sub>2</sub> D <sub>2</sub> O <sup>+</sup> , C <sub>2</sub> H <sub>4</sub> O <sup>+</sup> )                                                               | C <sub>2</sub> H <sub>2</sub> DO <sup>+</sup> (C <sub>2</sub> D <sub>2</sub> O <sup>+</sup> , C <sub>2</sub> H <sub>4</sub> O <sup>+</sup> )                                                               | C <sub>2</sub> DH <sub>2</sub> O <sup>+</sup> (C <sub>2</sub> H <sub>4</sub> O <sup>+</sup> , C <sub>2</sub> D <sub>2</sub> O <sup>+</sup> )                                                                                                                             |
| 45                 |                                                                                                                                                                                                            |                                                                                                                                                                                                            | CH <sub>3</sub> NO <sup>+</sup>                                                                                                                                                                                                                                          |
| 45                 | C <sub>2</sub> H <sub>5</sub> O <sup>+</sup> (C <sub>2</sub> H <sub>3</sub> DO <sup>+</sup> , C <sub>2</sub> HD <sub>2</sub> O <sup>+</sup> )                                                              | C <sub>2</sub> H <sub>5</sub> O <sup>+</sup> (C <sub>2</sub> H <sub>3</sub> DO <sup>+</sup> , C <sub>2</sub> HD <sub>2</sub> O <sup>+</sup> )                                                              | C <sub>2</sub> H <sub>5</sub> O <sup>+</sup> (C <sub>2</sub> DH <sub>3</sub> O <sup>+</sup> , C <sub>2</sub> D <sub>2</sub> HO <sup>+</sup> )                                                                                                                            |
| 46                 | C <sub>2</sub> H <sub>2</sub> D <sub>2</sub> O <sup>+</sup> (C <sub>2</sub> D <sub>3</sub> O <sup>+</sup> , C <sub>2</sub> H <sub>4</sub> DO <sup>+</sup> , C <sub>2</sub> H <sub>6</sub> O <sup>+</sup> ) | C <sub>2</sub> H <sub>2</sub> D <sub>2</sub> O <sup>+</sup> (C <sub>2</sub> D <sub>3</sub> O <sup>+</sup> , C <sub>2</sub> H <sub>4</sub> DO <sup>+</sup> , C <sub>2</sub> H <sub>6</sub> O <sup>+</sup> ) | C <sub>2</sub> D <sub>3</sub> O <sup>+</sup> (C <sub>2</sub> D <sub>2</sub> H <sub>2</sub> O <sup>+</sup> , C <sub>2</sub> DH <sub>4</sub> O <sup>+</sup> )                                                                                                              |
| 47                 |                                                                                                                                                                                                            |                                                                                                                                                                                                            | CH <sub>3</sub> O <sub>2</sub> <sup>+</sup> (CDHO <sub>2</sub> <sup>+</sup> )                                                                                                                                                                                            |
| 55                 | C <sub>3</sub> H <sub>3</sub> O <sup>+</sup> (C <sub>3</sub> HDO <sup>+</sup> )                                                                                                                            | C <sub>3</sub> H <sub>3</sub> O <sup>+</sup> (C <sub>3</sub> HDO <sup>+</sup> )                                                                                                                            | C <sub>3</sub> H <sub>3</sub> O <sup>+</sup> (C <sub>3</sub> DHO <sup>+</sup> )                                                                                                                                                                                          |
| 57                 | C <sub>3</sub> H <sub>5</sub> O <sup>+</sup> (C <sub>3</sub> H <sub>3</sub> DO <sup>+</sup> , C <sub>3</sub> HD <sub>2</sub> O <sup>+</sup> )                                                              |                                                                                                                                                                                                            | C <sub>3</sub> H <sub>5</sub> O <sup>+</sup> (C <sub>3</sub> DH <sub>3</sub> O <sup>+</sup> , C <sub>3</sub> D <sub>2</sub> HO <sup>+</sup> )                                                                                                                            |
| 59                 |                                                                                                                                                                                                            |                                                                                                                                                                                                            | C <sub>3</sub> H <sub>7</sub> O <sup>+</sup> (C <sub>3</sub> DH <sub>5</sub> O <sup>+</sup> , C <sub>3</sub> D <sub>3</sub> H <sub>3</sub> O <sup>+</sup> )                                                                                                              |
| 60                 |                                                                                                                                                                                                            |                                                                                                                                                                                                            | C <sub>3</sub> DH <sub>6</sub> O <sup>+</sup> (C <sub>3</sub> D <sub>2</sub> H <sub>4</sub> O <sup>+</sup> , C <sub>3</sub> H <sub>8</sub> O <sup>+</sup> , C <sub>3</sub> D <sub>3</sub> H <sub>2</sub> O <sup>+</sup> , C <sub>3</sub> D <sub>4</sub> O <sup>+</sup> ) |
| 69                 | C <sub>4</sub> H <sub>5</sub> O <sup>+</sup> (C <sub>4</sub> H <sub>3</sub> DO <sup>+</sup> , C <sub>4</sub> HD <sub>2</sub> O <sup>+</sup> )                                                              | C <sub>4</sub> H <sub>5</sub> O <sup>+</sup> (C <sub>4</sub> H <sub>3</sub> DO <sup>+</sup> , C <sub>4</sub> HD <sub>2</sub> O <sup>+</sup> )                                                              | C <sub>4</sub> H <sub>5</sub> O <sup>+</sup> (C <sub>4</sub> DH <sub>3</sub> O <sup>+</sup> , C <sub>4</sub> D <sub>2</sub> HO <sup>+</sup> )                                                                                                                            |

**Table S5** O-containing secondary ion species for ND<sub>3</sub> plasma-treated h-PP and h-PE, and NH<sub>3</sub> plasma-treated d-PE samples in their negative ToF-SIMS spectra.

| Mass<br><i>m/z</i> | PP                                                                              | Species<br>PE                                                                   | dPE                                                                             |
|--------------------|---------------------------------------------------------------------------------|---------------------------------------------------------------------------------|---------------------------------------------------------------------------------|
| 16                 | O <sup>-</sup>                                                                  | O <sup>-</sup>                                                                  | O <sup>-</sup>                                                                  |
| 17                 | OH <sup>-</sup>                                                                 | OH <sup>-</sup>                                                                 | OH <sup>-</sup>                                                                 |
| 18                 | OD <sup>-</sup> (H <sub>2</sub> O <sup>-</sup> )                                | OD <sup>-</sup> (H <sub>2</sub> O <sup>-</sup> )                                | OD <sup>-</sup> (H <sub>2</sub> O <sup>-</sup> )                                |
| 30                 | NO <sup>-</sup>                                                                 | NO <sup>-</sup>                                                                 | NO <sup>-</sup>                                                                 |
| 31                 |                                                                                 |                                                                                 | CH <sub>3</sub> O <sup>-</sup> (CDHO <sup>-</sup> )                             |
| 32                 | O <sub>2</sub> <sup>-</sup>                                                     | O <sub>2</sub> <sup>-</sup>                                                     | O <sub>2</sub> <sup>-</sup>                                                     |
| 33                 | O <sub>2</sub> H <sup>-</sup>                                                   | O <sub>2</sub> H <sup>-</sup>                                                   | O <sub>2</sub> H <sup>-</sup>                                                   |
| 42                 | CNO <sup>-</sup>                                                                | CNO <sup>-</sup>                                                                | CNO <sup>-</sup>                                                                |
| 43                 | CHNO <sup>-</sup>                                                               | CHNO <sup>-</sup>                                                               | CHNO <sup>-</sup>                                                               |
| 43                 | C <sub>2</sub> H <sub>3</sub> O <sup>-</sup> (C <sub>2</sub> HDO <sup>-</sup> ) | C <sub>2</sub> H <sub>3</sub> O <sup>-</sup> (C <sub>2</sub> HDO <sup>-</sup> ) | C <sub>2</sub> H <sub>3</sub> O <sup>-</sup> (C <sub>2</sub> HDO <sup>-</sup> ) |
| 45                 | CHO <sub>2</sub> <sup>-</sup>                                                   | CHO <sub>2</sub> <sup>-</sup>                                                   | CHO <sub>2</sub> <sup>-</sup>                                                   |
